# Supplementary material for: Incoherence between Systemic Hemodynamic and Microcirculatory Response to Fluid Challenge in Critically Ill Patients
Source: MDPI journal article supplement (doi:10.3390/jcm10030507), 2021-02-01
Supplement: s1 [file s1]

# Additional files

**Additional file 1.** Proportion of patients responding to fluid challenge according to changes in cardiac index (CI, i.e. > 10%) or to changes in the proportion of perfused small vessels (PPV, > 10%), in relationship to the use of norepinephrine or sedation. Total of fluid challenge = 41.

|                           |                   | Responders PPV | Non-responders PPV |
|---------------------------|-------------------|----------------|--------------------|
| Norepinephrine, (n=24)    | Responders CI     | 6              | 8                  |
|                           | Non-responders CI | 3              | 7                  |
| No norepinephrine, (n=17) | Responders CI     | 5              | 5                  |
|                           | Non-responders CI | 3              | 4                  |
| Sedation, (n=24)          | Responders CI     | 10             | 6                  |
|                           | Non-responders CI | 3              | 5                  |
| No Sedation, (n=17)       | Responders CI     | 3              | 5                  |
|                           | Non-responders CI | 3              | 6                  |

**Additional file 2.** Correlation analysis in the subgroups of patients treated (right) or not (left) with norepinephrine drug infusion. CI, cardiac index; PPV, proportion of perfused small vessels; MFI, mean flow index.

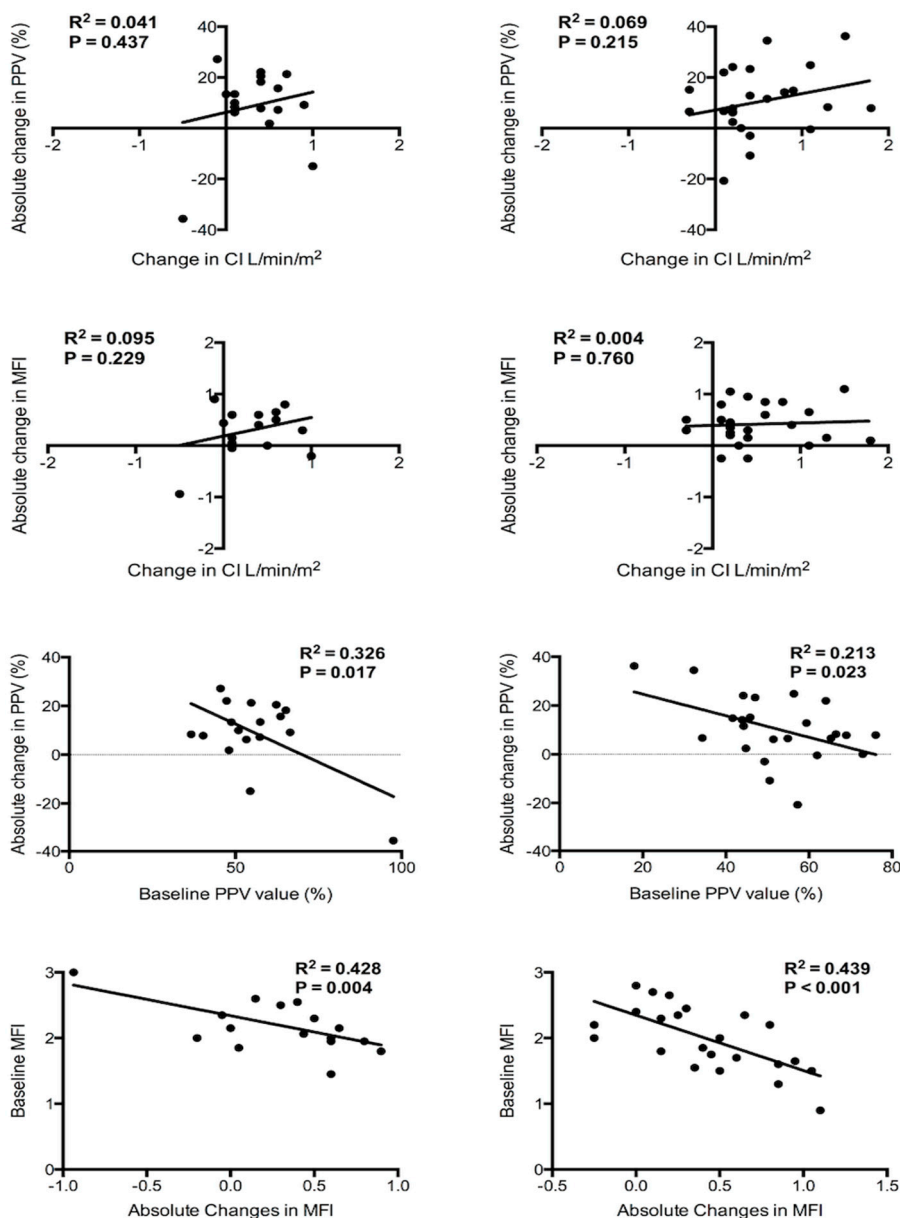

**Additional file 3.** Correlation analysis in the subgroups of patients treated (right) or not (left) with sedation therapy. CI, cardiac index; PPV, proportion of perfused small vessels; MFI, mean flow index.

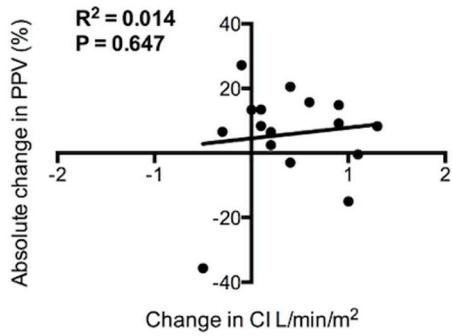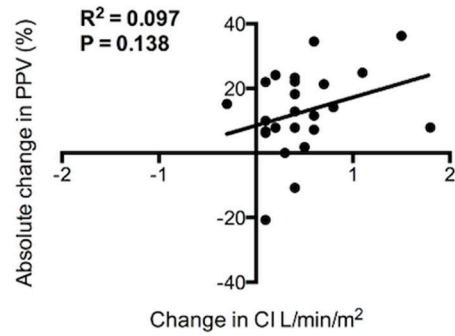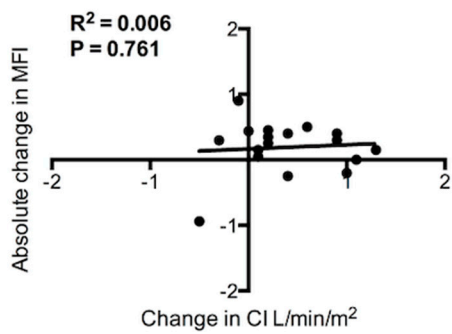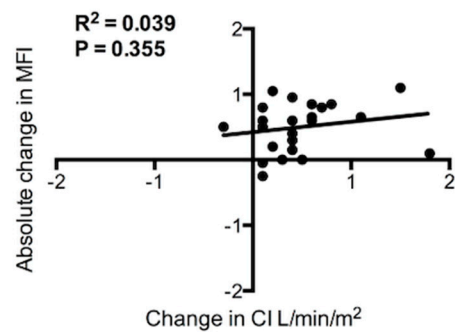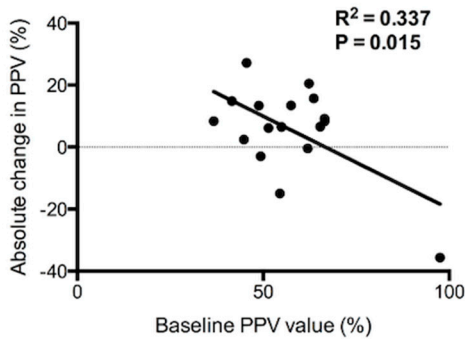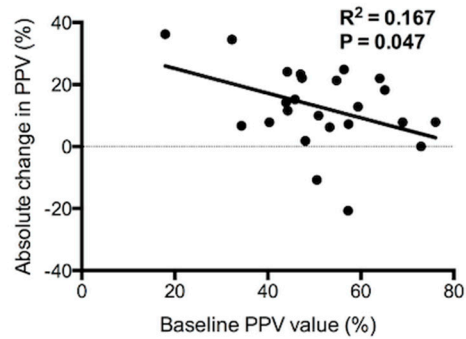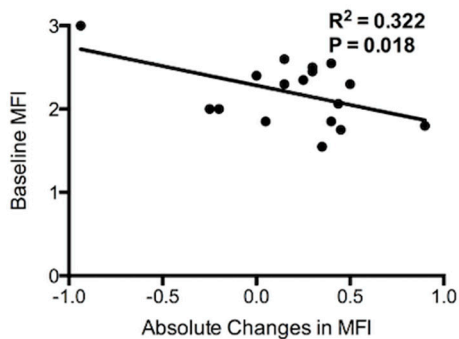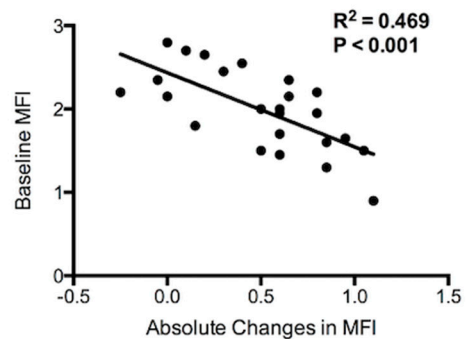

**Additional File 4.** Univariate analysis between responders and non-responders to fluid challenge according to changes in the proportion of perfused small vessels greater (i.e. > 10%).

| Variable                                             | Non Responders<br>N = 22 | Responders<br>N = 19 | P value |
|------------------------------------------------------|--------------------------|----------------------|---------|
| <i>Hemodynamics</i>                                  |                          |                      |         |
| Heart rate, beat per minutes                         | 93 [81-100]              | 85 [74-112]          | 0.862   |
| Mean arterial pressure, mmHg                         | 72 [69-81]               | 68 [63-74]           | 0.124   |
| Central venous pressure, mmHg                        | 8 [6-11]                 | 7 [6-12]             | 0.668   |
| Cardiac index, L/min/m <sup>2</sup>                  | 2.7 [2.3-3.1]            | 2.6 [2.1-3.1]        | 0.998   |
| Lactate, mmol/L                                      | 1.5 [1.0-2.3]            | 1.8 [1.1-4.1]        | 0.114   |
| Central oxygen venous saturation, %                  | 70 [61-75]               | 71 [63-81]           | 0.099   |
| Venous arterial carbon dioxide gap, mmHg             | 8 [6-9]                  | 8 [6-11]             | 0.421   |
| <i>Microcirculation</i>                              |                          |                      |         |
| Total vessel density, mm/mm <sup>2</sup>             | 15.1 [13.2-18.2]         | 14.6 [12.4-18.3]     | 0.091   |
| Density of perfused small vessel, mm/mm <sup>2</sup> | 8.7 [6.4-10.3]           | 6.8 [5.7-10.2]       | 0.700   |
| Proportion of perfused small vessels, (PPV) %        | 55 [49-66]               | 47 [44-59]           | 0.072   |
| Microvascular flow index, (MFI)                      | 2.2 [1.8-2.5]            | 1.9 [1.6-2.3]        | 0.116   |
| Heterogeneity of MFI, (%)                            | 0.44 [0.30-0.61]         | 0.52 [0.35-0.69]     | 0.192   |
| Heterogeneity of PPV, (%)                            | 0.56 [0.36-0.73]         | 0.52 [0.35-0.69]     | 0.178   |

PPV = proportion of perfused vessels; MFI = mean flow index; fluid challenge = 41.
